# Supplementary material for: Circular RNA hsa_circ_0000848 Promotes Trophoblast Cell Migration and Invasion and Inhibits Cell Apoptosis by Sponging hsa-miR-6768-5p
Source: Front Cell Dev Biol. 2020 May 19;8:278. doi: 10.3389/fcell.2020.00278 (PMC7249963; doi:10.3389/fcell.2020.00278)
Supplement: TABLE S1 — Detailed characteristics of participants. [file Table_1.XLSX]

## Sheet: Sheet1
Tissue number	Maternal age (years)	Gestation (weeks)	Birth weight (g)
FGR 1	21	38.7143	2300	used for qRT-PCR
FGR 2	27	37.4286	2350	used for qRT-PCR
FGR 3	24	38	2490	used for qRT-PCR
FGR 4	29	38	2440	used for qRT-PCR
FGR 5	36	38	2350	used for qRT-PCR
FGR 6	33	38.5714	2100	used for qRT-PCR
FGR 7	22	39.1429	2340	used for qRT-PCR
FGR 8	27	40.4286	2400	used for qRT-PCR
FGR 9	24	37.5714	2040	used for qRT-PCR
FGR 10	31	38.5714	2170	used for qRT-PCR
FGR 11	38	35	930	used for qRT-PCR
FGR 12	27	36	1860	used for qRT-PCR
FGR 13	33	38.1429	2500	used for qRT-PCR
FGR 14	32	40.4286	2350	used for qRT-PCR
FGR 15	27	39.1429	2460	used for qRT-PCR
FGR 16	33	37.7143	2440	used for qRT-PCR
FGR 17	27	39.5714	2370	used for qRT-PCR
FGR 18	35	38.1429	2370	used for qRT-PCR
FGR 19	20	38	2490	used for qRT-PCR
FGR 20	24	37.7143	2260	used for qRT-PCR
FGR 21	32	37.4286	2480	used for qRT-PCR
FGR 22	32	37.4286	2370	used for qRT-PCR
FGR 23	39	37.5714	2310	used for qRT-PCR
FGR 24	39	36.1429	2440	used for qRT-PCR
FGR 25	30	37.7143	2500	used for qRT-PCR
FGR 26	36	36.5714	2330	used for qRT-PCR
FGR 27	38	39.4286	2430	used for qRT-PCR
FGR 28	37	38.1429	2410	used for qRT-PCR
FGR 29	29	38.4286	2300	used for qRT-PCR
FGR 30	33	38	2170	used for qRT-PCR
FGR 31	32	37.5714	2420	used for qRT-PCR
FGR 32	30	35.4286	1670	used for qRT-PCR
FGR 33	42	37.7143	1800	used for qRT-PCR
FGR 34	27	38.1429	2260	used for qRT-PCR
FGR 35	24	38	2480	used for qRT-PCR
FGR 36	31	37.7143	2370	used for qRT-PCR
FGR 37	38	37.4286	2310	used for qRT-PCR
FGR 01	28	37.2857	1760	used for circRNA microarray analysis
FGR 02	28	30.8571	1080
FGR 03	28	39.5714	2340
Normal 1	30	38.8071	4080	used for qRT-PCR
Normal 2	30	38.6643	3190	used for qRT-PCR
Normal 3	38	38.2357	2780	used for qRT-PCR
Normal 4	31	39.5214	3070	used for qRT-PCR
Normal 5	31	37.6643	3220	used for qRT-PCR
Normal 6	34	38.0929	3810	used for qRT-PCR
Normal 7	41	36.95	3330	used for qRT-PCR
Normal 8	30	38.95	3140	used for qRT-PCR
Normal 9	43	36.95	3380	used for qRT-PCR
Normal 10	27	36.3786	2880	used for qRT-PCR
Normal 11	25	39.0929	3130	used for qRT-PCR
Normal 12	32	36.8071	3680	used for qRT-PCR
Normal 13	28	37.95	2960	used for qRT-PCR
Normal 14	34	37.8071	3280	used for qRT-PCR
Normal 15	31	38.6643	3990	used for qRT-PCR
Normal 16	31	38.2357	2930	used for qRT-PCR
Normal 17	27	37.6643	3200	used for qRT-PCR
Normal 18	30	39.0929	3480	used for qRT-PCR
Normal 19	33	37.95	3290	used for qRT-PCR
Normal 20	36	38.6643	3160	used for qRT-PCR
Normal 21	24	38.6643	4470	used for qRT-PCR
Normal 22	35	37.95	3000	used for qRT-PCR
Normal 23	37	38.3786	3060	used for qRT-PCR
Normal 24	26	39.0929	2620	used for qRT-PCR
Normal 25	22	40.0929	4060	used for qRT-PCR
Normal 26	21	40.0929	3740	used for qRT-PCR
Normal 27	33	38.2357	3450	used for qRT-PCR
Normal 28	29	39.3786	3450	used for qRT-PCR
Normal 29	26	39.0929	3430	used for qRT-PCR
Normal 30	27	39.8071	3830	used for qRT-PCR
Normal 31	32	38.0929	3460	used for qRT-PCR
Normal 32	32	37.8071	3490	used for qRT-PCR
Normal 33	30	39.95	3960	used for qRT-PCR
Normal 34	30	39.2357	3180	used for qRT-PCR
Normal 35	27	37.95	2620	used for qRT-PCR
Normal 36	25	38.6643	4060	used for qRT-PCR
Normal 37	32	38.6643	3740	used for qRT-PCR
Normal 01	32	37.95	3690	used for circRNA microarray analysis
Normal 02	29	37.95	3020
Normal 03	30	39.0929	3120
